# Supplementary material for: Empowering Participatory Research in Urban Health: Wearable Biometric and Environmental Sensors for Activity Recognition
Source: MDPI journal article supplement (doi:10.3390/s23249890), 2023-12-18
Supplement: s1 [file s1]

## Supplementary Material

# Empowering Participatory Research in Urban Health: Wearable Biometric and Environmental Sensors for Activity Recognition

**Rok Novak<sup>1,2,\*</sup>, Johanna Amalia Robinson<sup>1,2,3</sup>, Tjaša Kanduč<sup>1</sup>, Dimosthenis Sarigiannis<sup>4,5,6</sup>, Sašo Džeroski<sup>2,7</sup> and David Kocman<sup>1</sup>**

<sup>1</sup> Department of Environmental Sciences, Jožef Stefan Institute, 1000 Ljubljana, Slovenia; david.kocman@ijs.si (D.K.); tjasa.kanduc@ijs.si (T.K.)

<sup>2</sup> Ecotechnologies Programme, Jožef Stefan International Postgraduate School, 1000 Ljubljana, Slovenia; saso.dzeroski@ijs.si (S.D.)

<sup>3</sup> Center for research and development, Slovenian Institute for Adult Education, 1000 Ljubljana, Slovenia; johanna.robinson@acs.si (J.A.R.)

<sup>4</sup> Environmental Engineering Laboratory, Department of Chemical Engineering, Aristotle University of Thessaloniki, Thessaloniki 54124, Greece; denis@eng.auth.gr (D.S.)

<sup>5</sup> HERACLES Research Centre on the Exposome and Health, Center for Interdisciplinary Research and Innovation, Thessaloniki 57001, Greece

<sup>6</sup> Environmental Health Engineering, Department of Science, Technology and Society, University School of Advanced Study IUSS, 27100 Pavia, Italy

<sup>7</sup> Department of Knowledge Technologies, Jožef Stefan Institute, 1000 Ljubljana, Slovenia

\* Correspondence: rok.novak@ijs.si (R.N.)

## Overview of the dataset: all variables per activity

For a more thorough overview of the dataset, the mean values of all variables for each activity were calculated and plotted in Figure S1 for group H and in Figure S2 for group M.

Running stands out in both groups with the highest values of speed, heart rate, steps, and MET (though the last two are absent for group M due to technical issues with the SAT), and lowest for temperature. sports.OUT and sports.IN also stand out in all these values, while also having low mean PM concentrations. Low PM concentrations for sports are more pronounced in group H, though the values between the IN and OUT activities are reversed between the groups – higher PM for OUT in group H and higher IN for group M. Importantly, sports.IN has also a higher average temperature and relative humidity than sports.OUT.

The highest PM values, by far, are evident for smoking in both groups. This trend is more evident in group M where mean values exceed 80  $\mu\text{g}/\text{m}^3$  and are more than 50  $\mu\text{g}/\text{m}^3$  above the next highest value – cooking. In group H, the difference is between 10 and 20  $\mu\text{g}/\text{m}^3$  (50  $\mu\text{g}/\text{m}^3$  for smoking vs 35  $\mu\text{g}/\text{m}^3$  for cooking). Sports, running, and sleep show the lowest PM values, which is also in line with expectations, as there is less dust resuspension while sleeping and lower concentrations outdoors when performing sports. The slightly lower PM values of sports.IN compared to sports.OUT in group H is more difficult to explain. It could be a consequence of the TAD data logging time resolution in group H, where a person could be performing a sports activity outdoors for only 30 minutes while logging the entire hour as sports.OUT, even if half the hour was spent indoors where PM concentrations were higher. Sleep shows the lowest mean speed, heart rate, number of steps, and MET, all of which is expected. It does not stand out in terms of temperature and humidity.

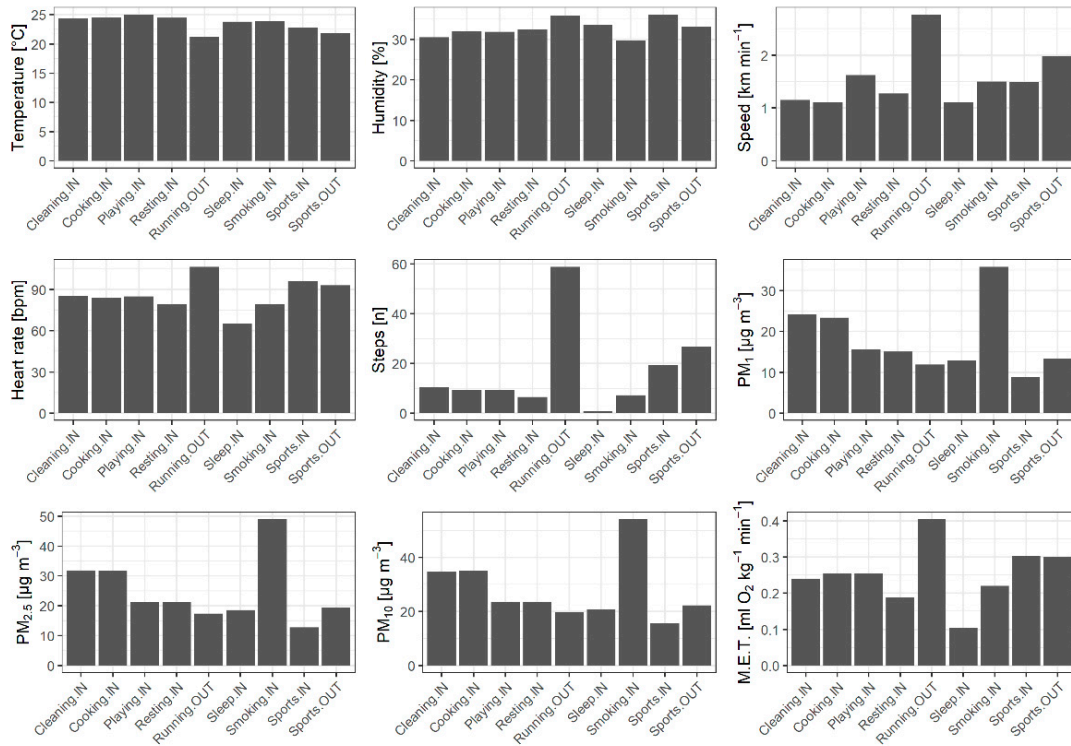

Figure S1 Average values for all variables, per activity, for group H

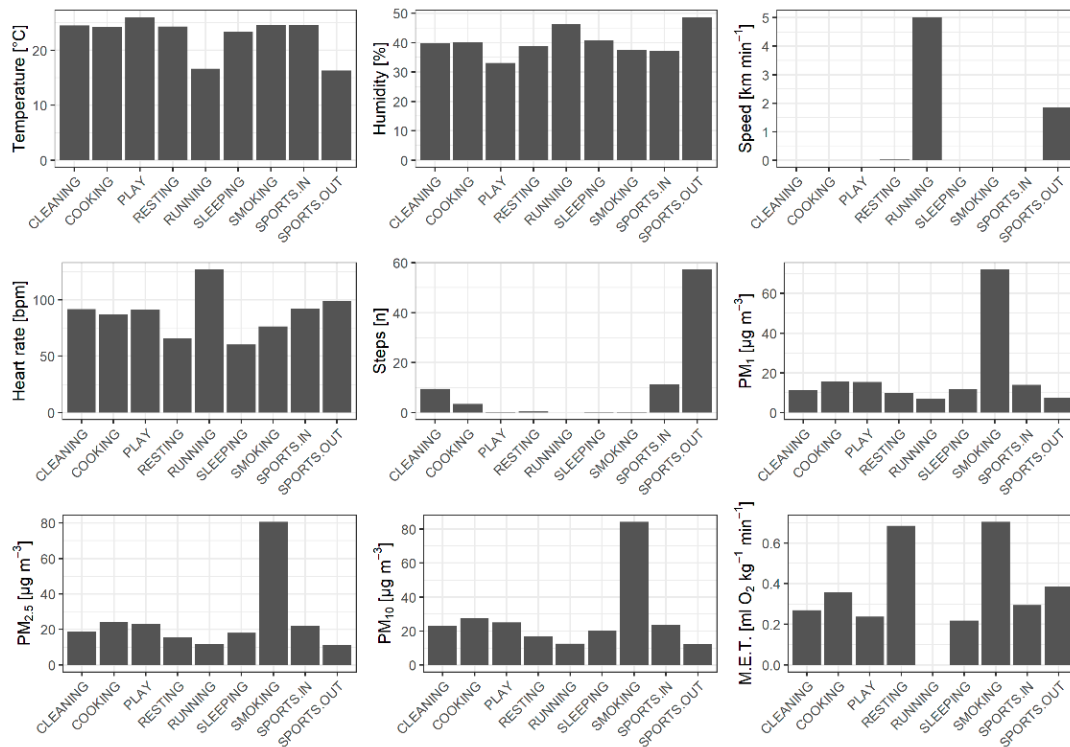

Figure S2 Average values for all variables, per activity for group M

### Results: confusion matrices

Results produced in WEKA included confusion matrices for each classifier (IBk, J48, RF) and both groups (group M and group H). Confusion matrices, as described in section 4.6, provide a summary of prediction outcomes on a classification problem and show the total number of correctly classified (diagonal entries) or incorrectly classified instances (all nondiagonal entries) for each class: Each row in the matrix covers all of the

instances that belong to one class (X), and each column covers the instances that are predicted to belong to (classified as) class Y. The confusion matrices for each classifier and each group are shown in Table S1 (IBk, H), Table S2 (IBk, M), Table S3 (J48, H), Table S4 (J48, M), Table S5 (RF, H) and Table S6 (RF, M).

Table S1: IBk confusion matrix - group H

| classified as -> | a    | b    | c    | d    | e    | f    | g    | h    | i   |
|------------------|------|------|------|------|------|------|------|------|-----|
| a=cleaning.in    | 1421 | 726  | 616  | 872  | 139  | 115  | 774  | 167  | 170 |
| b=cooking.in     | 231  | 2286 | 297  | 1033 | 86   | 144  | 634  | 148  | 141 |
| c=playing.in     | 209  | 621  | 1430 | 1353 | 243  | 76   | 699  | 165  | 204 |
| d=resting.in     | 274  | 664  | 496  | 1939 | 139  | 261  | 687  | 280  | 260 |
| e=running.out    | 228  | 371  | 545  | 1299 | 1680 | 51   | 551  | 99   | 176 |
| f=sleep.in       | 100  | 632  | 164  | 330  | 22   | 3262 | 256  | 80   | 154 |
| g=smoking.in     | 128  | 653  | 490  | 1287 | 122  | 140  | 1757 | 214  | 209 |
| h=sports.in      | 102  | 791  | 760  | 1057 | 97   | 208  | 749  | 1122 | 114 |
| i=sports.out     | 167  | 1226 | 539  | 1055 | 121  | 59   | 784  | 87   | 962 |

Table S2: IBk confusion matrix - group M

| classified as ->    | a | b | c | d | e    | f | g   | h    | i   | j   | k    | l   | m | n  |
|---------------------|---|---|---|---|------|---|-----|------|-----|-----|------|-----|---|----|
| a=cleaning.dry.in   | 3 | 0 | 0 | 2 | 237  | 0 | 67  | 47   | 37  | 18  | 24   | 3   | 0 | 0  |
| b=cleaning.steam.in | 0 | 0 | 0 | 0 | 137  | 0 | 0   | 57   | 31  | 104 | 21   | 66  | 0 | 0  |
| c=cleaning.wet.in   | 2 | 0 | 0 | 0 | 218  | 0 | 31  | 42   | 44  | 123 | 56   | 0   | 0 | 0  |
| d=cooking.cold.in   | 0 | 0 | 0 | 3 | 217  | 0 | 6   | 27   | 18  | 87  | 29   | 0   | 0 | 0  |
| e=cooking.hot.in    | 8 | 0 | 0 | 0 | 595  | 0 | 181 | 401  | 155 | 314 | 192  | 77  | 0 | 0  |
| f=play.on.feet.in   | 1 | 0 | 0 | 0 | 0    | 0 | 2   | 42   | 10  | 4   | 26   | 0   | 0 | 0  |
| g=play.sedentary.in | 0 | 0 | 0 | 0 | 96   | 0 | 226 | 116  | 0   | 16  | 8    | 7   | 0 | 0  |
| h=resting.in        | 4 | 0 | 0 | 0 | 1203 | 0 | 24  | 2103 | 92  | 608 | 775  | 191 | 0 | 0  |
| i=resting.out       | 0 | 0 | 0 | 0 | 105  | 0 | 0   | 1    | 84  | 28  | 3    | 4   | 0 | 0  |
| j=running.out       | 1 | 0 | 0 | 0 | 1    | 0 | 11  | 1    | 11  | 50  | 0    | 5   | 0 | 0  |
| k=sleeping.in       | 1 | 0 | 0 | 0 | 883  | 0 | 4   | 1802 | 14  | 82  | 2107 | 107 | 0 | 0  |
| l=smoking.in        | 0 | 0 | 0 | 0 | 113  | 0 | 12  | 132  | 0   | 68  | 6    | 438 | 0 | 0  |
| m=sports.in         | 0 | 0 | 0 | 0 | 195  | 0 | 7   | 44   | 5   | 53  | 57   | 0   | 0 | 0  |
| n=sports.out        | 6 | 0 | 0 | 0 | 251  | 0 | 8   | 95   | 307 | 74  | 1    | 0   | 0 | 32 |

Table S3: J48 confusion matrix - group H

| classified as -> | a    | b    | c    | d    | e    | f    | g    | h    | i    |
|------------------|------|------|------|------|------|------|------|------|------|
| a=cleaning.in    | 2166 | 797  | 317  | 502  | 159  | 171  | 210  | 356  | 322  |
| b=cooking.in     | 404  | 2708 | 451  | 354  | 83   | 143  | 142  | 325  | 390  |
| c=playing.in     | 570  | 782  | 1761 | 644  | 237  | 78   | 141  | 264  | 523  |
| d=resting.in     | 495  | 645  | 556  | 1599 | 175  | 348  | 366  | 307  | 509  |
| e=running.out    | 430  | 342  | 391  | 243  | 2921 | 98   | 124  | 154  | 297  |
| f=sleep.in       | 109  | 60   | 21   | 321  | 39   | 4189 | 64   | 183  | 14   |
| g=smoking.in     | 373  | 599  | 432  | 769  | 233  | 368  | 1546 | 227  | 453  |
| h=sports.in      | 249  | 582  | 502  | 429  | 171  | 135  | 210  | 2120 | 602  |
| i=sports.out     | 511  | 1146 | 496  | 191  | 168  | 107  | 103  | 373  | 1905 |

Table S4: J48 confusion matrix - group M

| classified as ->    | a   | b   | c   | d   | e    | f  | g   | h    | i  | j  | k    | l   | m  | n   |
|---------------------|-----|-----|-----|-----|------|----|-----|------|----|----|------|-----|----|-----|
| a=cleaning.dry.in   | 226 | 16  | 14  | 6   | 105  | 1  | 6   | 56   | 0  | 0  | 0    | 0   | 1  | 7   |
| b=cleaning.steam.in | 6   | 248 | 3   | 4   | 22   | 0  | 0   | 128  | 0  | 0  | 0    | 3   | 1  | 1   |
| c=cleaning.wet.in   | 8   | 44  | 208 | 16  | 121  | 0  | 3   | 97   | 0  | 0  | 5    | 4   | 4  | 6   |
| d=cooking.cold.in   | 4   | 24  | 11  | 153 | 134  | 0  | 0   | 55   | 0  | 1  | 1    | 2   | 1  | 1   |
| e=cooking.hot.in    | 25  | 11  | 35  | 48  | 1511 | 1  | 8   | 216  | 2  | 1  | 38   | 3   | 5  | 19  |
| f=play.on.feet.in   | 6   | 0   | 3   | 6   | 8    | 51 | 1   | 1    | 0  | 1  | 0    | 0   | 8  | 0   |
| g=play.sedentary.in | 2   | 0   | 2   | 4   | 37   | 1  | 405 | 15   | 0  | 0  | 0    | 1   | 0  | 2   |
| h=resting.in        | 35  | 30  | 12  | 42  | 254  | 2  | 17  | 3738 | 0  | 0  | 818  | 47  | 1  | 4   |
| i=resting.out       | 13  | 0   | 2   | 1   | 66   | 0  | 2   | 30   | 99 | 0  | 0    | 0   | 0  | 12  |
| j=running.out       | 0   | 0   | 0   | 2   | 1    | 0  | 3   | 2    | 0  | 65 | 0    | 2   | 0  | 5   |
| k=sleeping.in       | 1   | 18  | 0   | 8   | 20   | 0  | 21  | 247  | 0  | 0  | 4684 | 0   | 1  | 0   |
| l=smoking.in        | 4   | 5   | 7   | 6   | 96   | 0  | 3   | 102  | 0  | 0  | 2    | 544 | 0  | 0   |
| m=sports.in         | 5   | 20  | 23  | 2   | 136  | 5  | 6   | 58   | 0  | 0  | 16   | 2   | 87 | 1   |
| n=sports.out        | 34  | 0   | 22  | 21  | 44   | 0  | 0   | 15   | 1  | 5  | 11   | 0   | 0  | 621 |

Table S5: Random Forest confusion matrix - group H

| classified as -> | a    | b    | c    | d    | e    | f    | g    | h    | i    |
|------------------|------|------|------|------|------|------|------|------|------|
| a=cleaning.in    | 2329 | 416  | 396  | 431  | 212  | 168  | 329  | 305  | 414  |
| b=cooking.in     | 446  | 2198 | 465  | 351  | 151  | 162  | 323  | 344  | 560  |
| c=playing.in     | 451  | 404  | 2208 | 535  | 244  | 85   | 348  | 308  | 417  |
| d=resting.in     | 509  | 455  | 560  | 1355 | 251  | 380  | 605  | 355  | 530  |
| e=running.out    | 275  | 123  | 167  | 242  | 3752 | 99   | 63   | 137  | 142  |
| f=sleep.in       | 133  | 66   | 46   | 266  | 41   | 4201 | 120  | 102  | 25   |
| g=smoking.in     | 257  | 340  | 351  | 583  | 249  | 344  | 2350 | 212  | 314  |
| h=sports.in      | 220  | 293  | 277  | 452  | 175  | 146  | 213  | 2802 | 422  |
| i=sports.out     | 313  | 517  | 344  | 263  | 209  | 114  | 252  | 377  | 2611 |

Table S6: Random Forest confusion matrix - group M

| classified as ->    | a   | b   | c   | d   | e    | f  | g   | h    | i   | j  | k    | l   | m   | n   |
|---------------------|-----|-----|-----|-----|------|----|-----|------|-----|----|------|-----|-----|-----|
| a=cleaning.dry.in   | 192 | 0   | 19  | 20  | 90   | 0  | 0   | 79   | 1   | 0  | 0    | 0   | 15  | 22  |
| b=cleaning.steam.in | 1   | 201 | 34  | 3   | 17   | 0  | 0   | 151  | 0   | 0  | 0    | 1   | 8   | 0   |
| c=cleaning.wet.in   | 5   | 22  | 267 | 27  | 86   | 0  | 0   | 72   | 2   | 0  | 4    | 2   | 23  | 6   |
| d=cooking.cold.in   | 12  | 2   | 18  | 166 | 115  | 0  | 0   | 53   | 0   | 0  | 4    | 2   | 10  | 5   |
| e=cooking.hot.in    | 27  | 17  | 63  | 57  | 1373 | 0  | 0   | 287  | 7   | 0  | 33   | 4   | 18  | 37  |
| f=play.on.feet.in   | 2   | 0   | 4   | 5   | 20   | 37 | 1   | 2    | 0   | 0  | 0    | 0   | 10  | 4   |
| g=play.sedentary.in | 1   | 0   | 5   | 4   | 44   | 1  | 361 | 23   | 0   | 1  | 16   | 1   | 4   | 8   |
| h=resting.in        | 33  | 22  | 28  | 51  | 201  | 0  | 2   | 4145 | 1   | 3  | 494  | 3   | 9   | 8   |
| i=resting.out       | 2   | 0   | 0   | 4   | 65   | 0  | 0   | 31   | 102 | 0  | 0    | 0   | 1   | 20  |
| j=running.out       | 0   | 0   | 0   | 0   | 6    | 0  | 0   | 0    | 1   | 71 | 0    | 0   | 0   | 2   |
| k=sleeping.in       | 0   | 10  | 1   | 6   | 2    | 0  | 22  | 484  | 0   | 0  | 4475 | 0   | 0   | 0   |
| l=smoking.in        | 6   | 2   | 6   | 2   | 87   | 0  | 1   | 132  | 0   | 0  | 8    | 516 | 9   | 0   |
| m=sports.in         | 3   | 0   | 34  | 4   | 98   | 1  | 3   | 64   | 0   | 1  | 17   | 0   | 131 | 5   |
| n=sports.out        | 13  | 2   | 10  | 26  | 23   | 0  | 0   | 11   | 14  | 0  | 8    | 2   | 0   | 665 |
